# Supplementary material for: Factor Structure of the eHEALS
Source: Atypon-hosted journal article supplement (doi:10.1026/0012-1924/a000294), 2022-09-12
Supplement: 0012-1924_a000294_esm1.pdf [file 0012-1924_a000294_esm1.pdf]

**ESM 1.** Exemplary CFA results for the eHEALS.

| Number of factors | Composition of factors                                                                                                                                                                                                                                                                                                                                                     | Population                                                                                                                                                                                     | Authors                                                                                                                              |
|-------------------|----------------------------------------------------------------------------------------------------------------------------------------------------------------------------------------------------------------------------------------------------------------------------------------------------------------------------------------------------------------------------|------------------------------------------------------------------------------------------------------------------------------------------------------------------------------------------------|--------------------------------------------------------------------------------------------------------------------------------------|
| 1                 | Items 1 - 8                                                                                                                                                                                                                                                                                                                                                                | Japanese adults<br>Spanish university students<br>a Chinese rural population<br>Chinese patients<br>Brazilian adults<br>Brazilian patients from a dental clinic                                | Mitsutake et al., 2011<br>Paramio Pérez et al., 2015<br>Ma & Wu, 2019<br>Xu et al., 2020<br>Mialhe et al., 2021<br>Baek et al., 2021 |
| 2                 | information seeking, Items 1, 2, 3, 4, 5, 8;<br>information appraisal, Items 6, 7<br><br>information seeking, Items 1, 2, 4; information appraisal, Items 3, 5, 6, 7, 8                                                                                                                                                                                                    | 12th-grade students in Germany<br><br>Israeli adults                                                                                                                                           | Soellner et al., 2014<br><br>Neter et al., 2015                                                                                      |
| 3                 | awareness, Items 3, 4; skills, Items 1, 2, 5; evaluation, Items 6, 7, 8<br><br>information seeking, Items 1, 3, 4; information appraisal, Items 6, 7; information use, Items 2, 5, 8<br><br>Replication of Sudbury-Riley et al. (2017); Item 3 was removed due to model misfit<br><br>Replication of Sudbury-Riley et al. (2017)<br><br>Replication of Paige et al. (2018) | baby boomers in the United States, United Kingdom, and New Zealand<br><br>women aged 50 in Germany<br><br>medical imaging outpatients<br><br>Korean hospital nurses<br><br>students in the USA | Sudbury-Riley et al., 2017<br><br>Reder et al., 2019<br><br>Hyde et al., 2018<br><br>Gartrell et al., 2020<br><br>Giger et al., 2021 |

*Note.* Adapted and amended from „eHealth literacy instruments: Systematic review of measurement properties” by Lee, J., Lee, E.-H. & Chae, D., 2021, Journal of Medical Internet Research, 23(11), e30644, Multimedia Appendix 2.

## References

- Baek, J. J. H., Soares, G. H., da Rosa, G. C., Mialhe, F. L., Biazevic, M. G. H., & Michel-Crosato, E. (2021). Network analysis and psychometric properties of the Brazilian version of the eHealth literacy scale in a dental clinic setting. *International Journal of Medical Informatics*, *153*, 104532. <https://doi.org/10.1016/j.ijmedinf.2021.104532>
- Gartrell, K., Han, K., Trinkoff, A., & Cho, H. (2020). 3-factor structure of the eHealth literacy scale and its relationship with nurses' health-promoting behaviours and performance quality. *Journal of Advanced Nursing*, *76*(10), 2522–2530. <https://doi.org/10.1111/jan.14490>
- Giger, J. T., Barnhart, S., Feltner, F., Slone, M., Lawler, M. J., Windsor, L., & Windsor, A. (2021). Validating the eHealth literacy scale in rural adolescents. *Journal of Rural Health*, *37*(3), 504–516. <https://doi.org/10.1111/jrh.12509>
- Hyde, L. L., Boyes, A. W., Evans, T.-J., Mackenzie, L. J., & Sanson-Fisher, R. (2018). 3-factor structure of the eHealth literacy scale among magnetic resonance imaging and computed tomography outpatients: A confirmatory factor analysis. *JMIR Human Factors*, *5*(1), e6. <https://doi.org/10.2196/humanfactors.9039>
- Lee, J., Lee, E.-H., & Chae, D. (2021). eHealth literacy instruments: Systematic review of measurement properties. *Journal of Medical Internet Research*, *23*(11), e30644. <https://doi.org/10.2196/30644>
- Ma, Z., & Wu, M. (2019). The psychometric properties of the Chinese eHealth Literacy Scale (C-eHEALS) in a Chinese rural population: Cross-sectional validation study. *Journal of Medical Internet Research*, *21*(10), e15720. <https://doi.org/10.2196/15720>
- Mialhe, F. L., Moraes, K. L., Sampaio, H. A. d. C., Brasil, V. V., Vila, V. d. S. C., Soares, G. H., & Rebustini, F. (2021). Evaluating the psychometric properties of the eHealth Literacy Scale in Brazilian adults. *Revista Brasileira de Enfermagem*, *75*(1), e20201320. <https://doi.org/10.1590/0034-7167-2020-1320>
- Mitsutake, S., Shibata, A., Ishii, K., Okazaki, K., & Oka, K. (2011). [Developing Japanese version of the eHealth literacy scale (eHEALS)]. *Nihon Koshu Eisei Zasshi [Japanese Journal of Public Health]*, *58*(5), 361–371.
- Neter, E., Brainin, E., & Baron-Epel, O. (2015). The dimensionality of health literacy and eHealth literacy. *European Health Psychologist*, *17*(6), 275–280.
- Paramio Pérez, G., Almagro, B. J., Hernando Gómez, Á., & Aguaded Gómez, J. I. (2015). [Validation of the eHealth Literacy Scale (eHEALS) in Spanish university students]. *Revista Espanola de Salud Publica*, *89*(3), 329–38. <https://doi.org/10.4321/S1135-57272015000300010>
- Reder, M., Soellner, R., & Kolip, P. (2019). Do women with high eHealth literacy profit more from a decision aid on mammography screening? Testing the moderation effect of the eHEALS in a randomized controlled trial. *Frontiers in Public Health*, *7*, 46. <https://doi.org/10.3389/fpubh.2019.00046>
- Soellner, R., Huber, S., & Reder, M. (2014). The concept of eHealth literacy and its measurement – German translation of the eHEALS. *Journal of Media Psychology*, *26*(1), 29–38. <https://doi.org/10.1027/1864-1105/a000104>
- Sudbury-Riley, L., FitzPatrick, M., & Schulz, P. J. (2017). Exploring the measurement properties of the eHealth Literacy Scale (eHEALS) among baby boomers: A multinational test of measurement invariance. *Journal of Medical Internet Research*, *19*(2), e53. <https://doi.org/10.2196/jmir.5998>
- Xu, R. H., Zhou, L., Lu, S. Y., Wong, E. L., Chang, J., & Wang, D. (2020). Psychometric validation and cultural adaptation of the simplified Chinese eHealth Literacy Scale: Cross-sectional study. *Journal of Medical Internet Research*, *22*(12), e18613. <https://doi.org/10.2196/18613>
