# Supplementary material for: Factor Structure of the eHEALS
Source: Atypon-hosted journal article supplement (doi:10.1026/0012-1924/a000294), 2022-09-12
Supplement: 0012-1924_a000294_esm2.pdf [file 0012-1924_a000294_esm2.pdf]

*Electronic Supplement 2.* German version of the eHEALS. This shows the German instruction, items, and response options.

Instruktion:

Im Folgenden finden Sie einige Aussagen zur gesundheitsbezogenen Nutzung des Mediums Internet. Bitte geben Sie jeweils an, inwieweit Sie den Aussagen zustimmen.

| Item | Wortlaut                                                                                                                      |
|------|-------------------------------------------------------------------------------------------------------------------------------|
| 1    | Ich weiß, wie ich im Internet nützliche Gesundheitsinformationen finde.                                                       |
| 2    | Ich weiß, wie ich das Internet nutzen kann, um Antworten auf meine Fragen rund um das Thema Gesundheit zu bekommen.           |
| 3    | Ich weiß, welche Quellen für Gesundheitsinformationen im Internet verfügbar sind.                                             |
| 4    | Ich weiß, wo im Internet ich nützliche Gesundheitsinformationen finden kann.                                                  |
| 5    | Ich weiß, wie ich Informationen aus dem Internet so nutzen kann, dass sie mir weiterhelfen.                                   |
| 6    | Ich bin in der Lage, Informationen, die ich im Internet finde, kritisch zu bewerten.                                          |
| 7    | Ich kann im Internet zuverlässige von fragwürdigen Informationen unterscheiden                                                |
| 8    | Wenn ich gesundheitsbezogene Entscheidungen auf Basis von Informationen aus dem Internet treffe, fühle ich mich dabei sicher. |

Antwortformat fünfstufig:

starke Ablehnung – eher Ablehnung – teils / teils – eher Zustimmung – starke Zustimmung
